# Supplementary material
Source: Springer Nature journal article supplement (https://www.springermedizin.de/resource/supplementary/13014_2013_902_MOESM2_ESM.pdf/9634398)

### Progression Free Survival

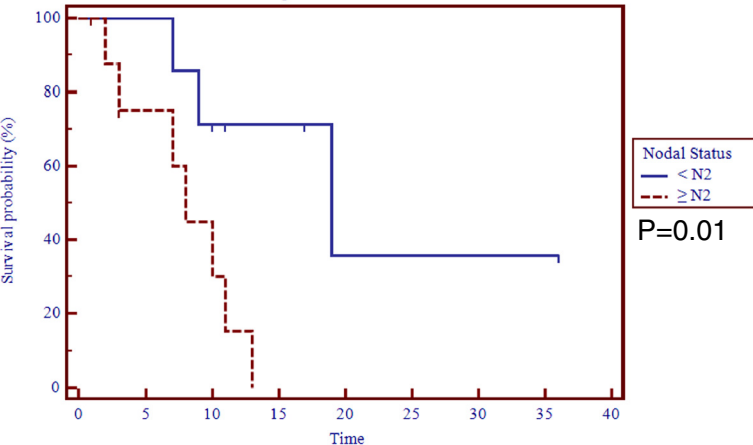

Number at risk

Group: < N2

7    7    4    3    1    1    1    1    0

Group: ≥ N2

9    5    2    0    0    0    0    0    0

Supplement: MOESM2 [file 9634398]
